# Supplementary material for: Retracted Article: Enhanced photoluminescence, Raman spectra and field-emission behavior of indium-doped ZnO nanostructures
Source: Royal Society of Chemistry journal article supplement (doi:10.1039/c3tc00082f), 2013-01-01
Supplement: c3tc00082f.pdf [file c3tc00082f.pdf]

## **Supporting Information**

### **Enhanced photoluminescence, Raman spectra and field-emission behavior of indium-doped ZnO nanostructures**

**Khalid Mahmood, Seung Bin Park<sup>\*</sup> and Hyung Jin Sung**

Department of Chemical & Biomolecular Engineering, and Department of  
Mechanical Engineering

Korea Advanced Institute of Science and Technology, 291 Daehak-ro,  
Yuseong-gu, Daejeon, 305-701, Republic of Korea

\*Corresponding author. Tel: +82-42-350-3298; Fax: +82-42-350-3910

E-mail address: [SeungBinPark@kaist.ac.kr](mailto:SeungBinPark@kaist.ac.kr)

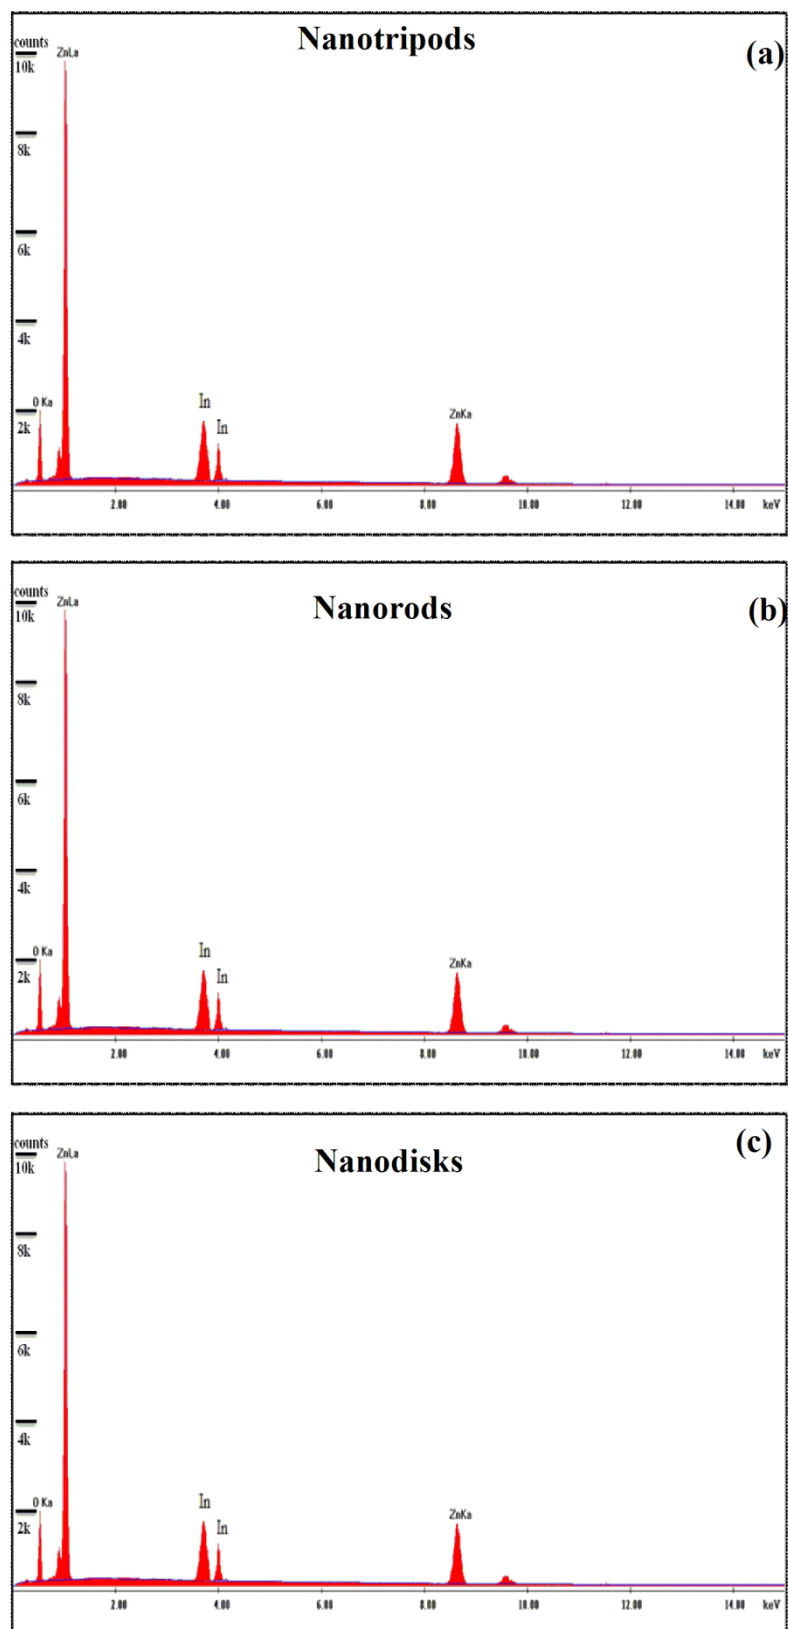

**Figure S1.** EDS spectrum for other three In-doped ZnO nanostructures: (a) nanotripods, (b) nanorods, and (c) nanodisks, respectively.

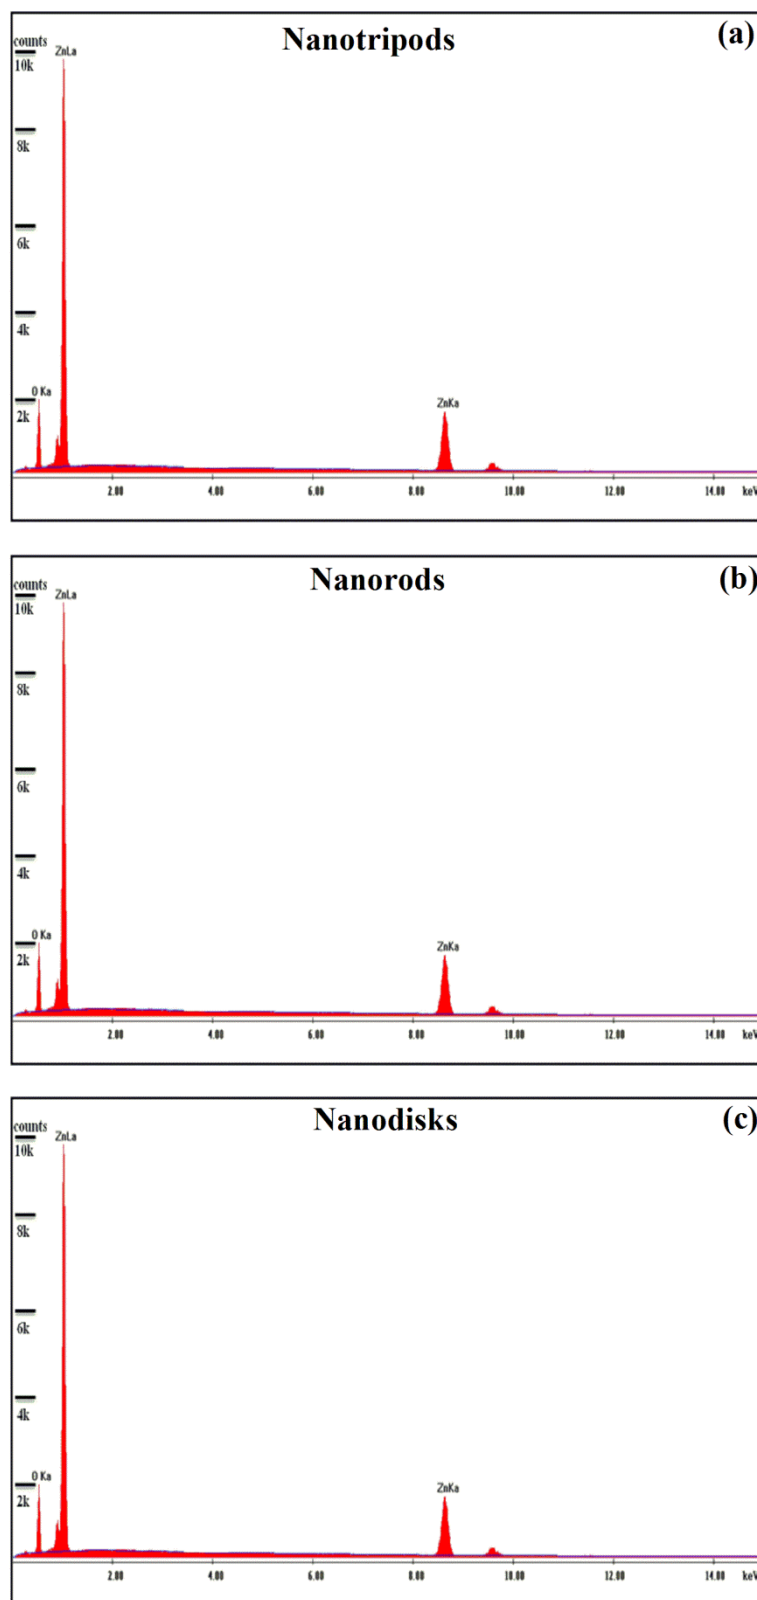

**Figure S2.** EDS spectrum for other three pure ZnO nanostructures: (a) nanotripods, (b) nanorods, and (c) nanodisks, respectively.

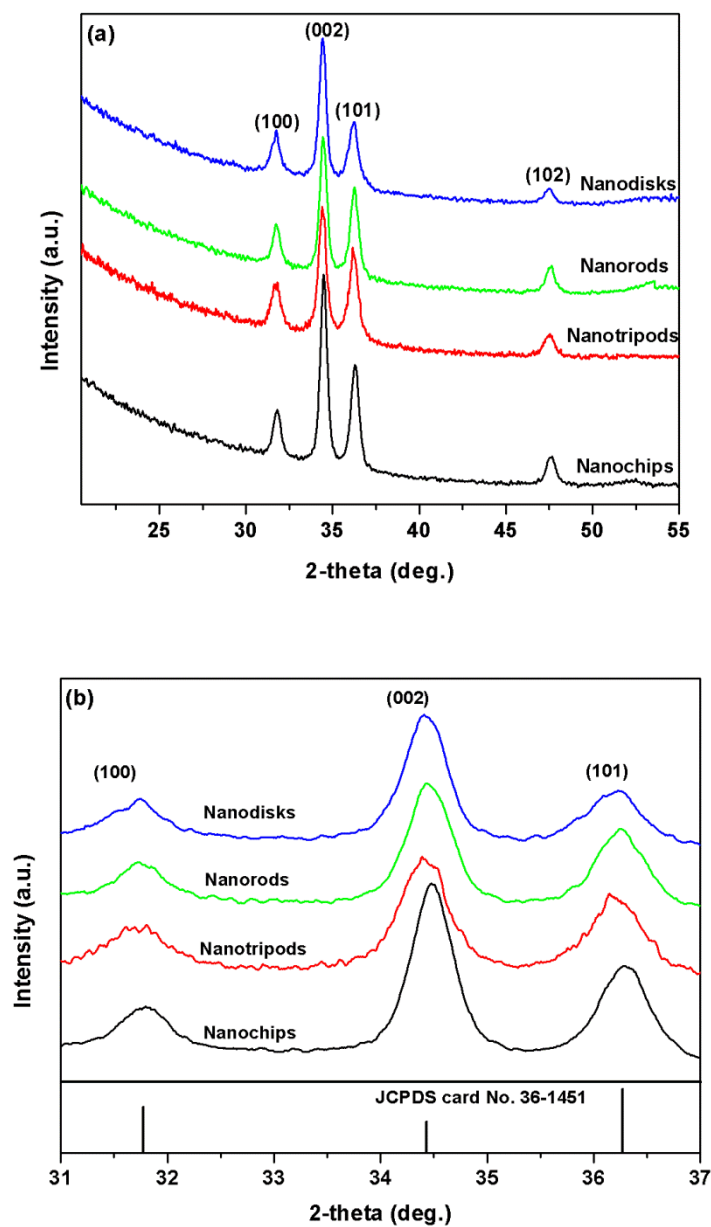

**Figure S3.** (a) XRD patterns of four various pure ZnO samples, and (b) the expanded spectra around 3 strongest lines showing that no peak shift was observed when compared with the standard peak position of pure ZnO.

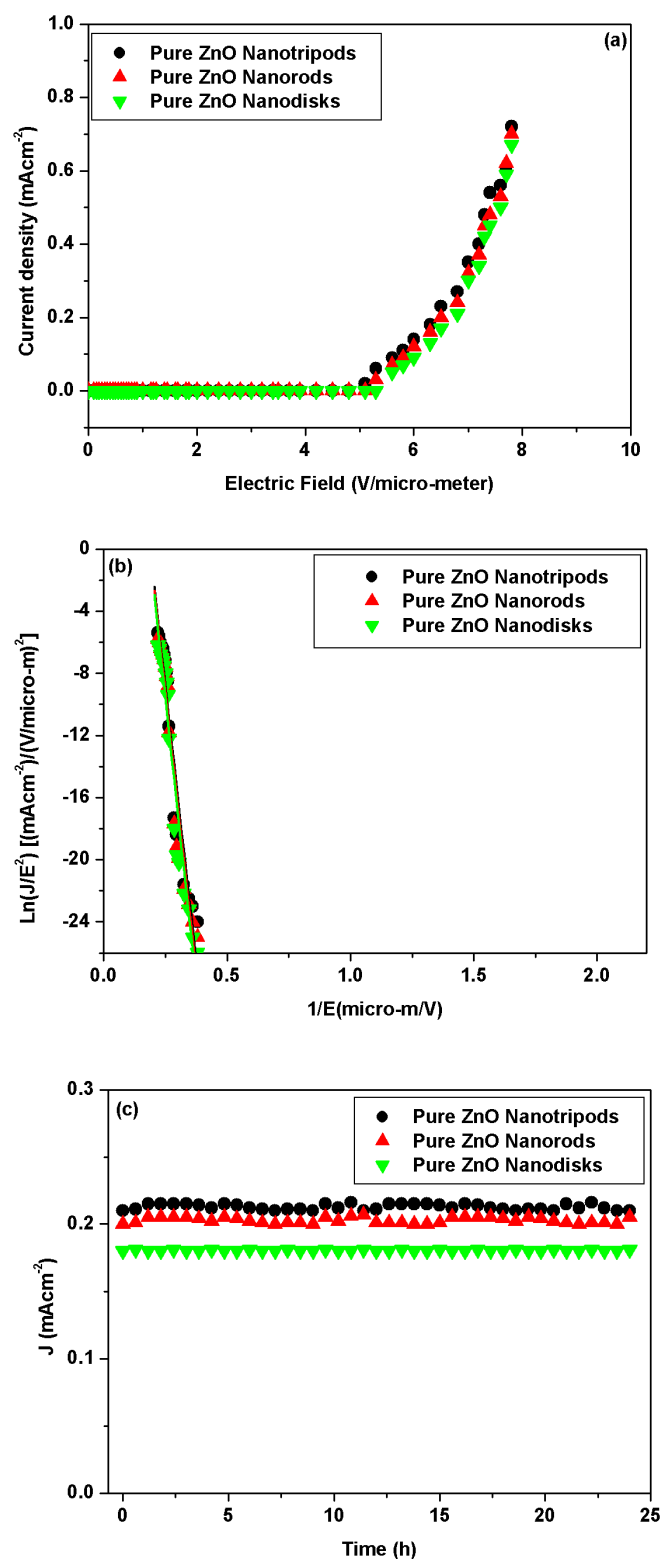

**Figure S4.** (a)  $J$ - $E$  plot comparison of other three pure ZnO nanostructures; (b) FN plots of the corresponding  $J$ - $E$  curves; (c) emission current density as a function of time demonstrates the field-emission stability.
